# Supplementary material
Source: publisher figshare collection journal article supplement (https://karger.figshare.com/articles/dataset/_/7145855)
Supplement: Supplementary file 1 [file 1]

Archive with 3 entries (3 files):
- PPS493365_sm3.PDF
- PPS493365_sm2.PDF
- PPS493365_sm1.PDF
