# Supplementary material
Source: publisher figshare collection journal article supplement (https://karger.figshare.com/articles/dataset/_/7145855)
Supplement: Supplementary file 1 [file 1 › PPS493365_sm1.PDF]

## **Evidence of a continuum of trait mindfulness deficits in psychiatric disorders**

### **Details for Supplemental Online Material**

#### **Sample Characteristics**

1714 patients (94.0%) were German citizens, the second largest group were Austrian citizens (N=19[1.0%]) followed by Turkish citizens (N=14[0.8%]) . 1779 patients (97.6%) had some kind of graduation from school and 479 (26.3%) had graduated from university. 816 patients (44.8%) were married, 501 patients (27.5%) had children and 875 (47.0%) were living with their partner a the time of admission. 593 patients (32.5%) worked full-time at the time of admission, 315 patients (17.3%) worked part-time, and 649 patients (35.6%) received either sickness benefits, (early) pension, unemployment benefits, and/or social care.
