# Supplementary material
Source: publisher figshare collection journal article supplement (https://karger.figshare.com/articles/dataset/_/7145855)
Supplement: Supplementary file 1 [file 1 › PPS493365_sm2.PDF]

## Evidence of a continuum of trait mindfulness deficits in psychiatric disorders

### Details for Supplemental Online Material

**Table 2. Mean CTQ scores and standard deviations across diagnostic groups**

| Diagnostic Group | Sexual Abuse | Physical Abuse | Emotional Abuse | Emotional Neglect | Physical Neglect |
|------------------|--------------|----------------|-----------------|-------------------|------------------|
| DID              | 17.8 (7.9)   | 14.2 (6.3)     | 19.1 (5.7)      | 20.5 (5.0)        | 13.7 (5.0)       |
| DDNOS            | 15.1 (7.4)   | 14.4 (6.2)     | 19.5 (4.8)      | 20.7 (4.8)        | 13.5 (4.5)       |
| BPD              | 14.2 (6.9)   | 12.8 (6.5)     | 18.6 (5.3)      | 20.4 (4.5)        | 12.8 (4.1)       |
| PTSD             | 12.6 (7.1)   | 11.4 (6.2)     | 16.4 (6.3)      | 18.4 (5.9)        | 12.0 (4.8)       |
| MDD-ct           | 7.5 (4.0)    | 8.7 (4.6)      | 14.4 (5.3)      | 17.3 (4.6)        | 10.0 (3.5)       |
| AD               | 6.5 (2.9)    | 6.4 (2.2)      | 10.1 (5.0)      | 13.4 (6.2)        | 8.0 (2.7)        |
| MDD-noct         | 5.12 (0.4)   | 5.4 (0.9)      | 7.0 (2.1)       | 8.9 (2.8)         | 6.1 (1.3)        |

*DID = dissociative identity disorder; DDNOS = dissociative disorder not otherwise specified; BPD = borderline personality disorder; PTSD = post-traumatic stress disorder; MDD-ct = major depressive disorder with a background of childhood trauma; AD = anxiety disorder; MDD-noct = major depressive disorder with no background of childhood trauma*
