# Supplementary material
Source: publisher figshare collection journal article supplement (https://karger.figshare.com/articles/dataset/_/7145855)
Supplement: Supplementary file 1 [file 1 › PPS493365_sm3.PDF]

## Evidence of a continuum of trait mindfulness deficits in psychiatric disorders

### Details for Supplemental Online Material

**Table 3. Results of the Games-Howell post hoc test**

| Comparison         | Mean difference [95% confidence interval] | df     | t    | p     |
|--------------------|-------------------------------------------|--------|------|-------|
| DID vs DDNOS       | 5.75 [-1.95, 13.45]                       | 104.18 | 2.25 | .281  |
| DID vs BPD         | 7.73 [0.73, 14.73]                        | 96.26  | 3.33 | .020  |
| DID vs PTSD        | 10.26 [4.34, 16.17]                       | 57.43  | 5.30 | <.001 |
| DID vs MDD-ct      | 12.22 [6.48, 17.96]                       | 49.77  | 6.54 | <.001 |
| DID vs AD          | 13.79 [6.19, 21.38]                       | 90.80  | 5.48 | <.001 |
| DID vs MDD-noct    | 16.02 [10.20, 21.84]                      | 53.37  | 8.43 | <.001 |
| DDNOS vs BPD       | 1.98 [-4.89, 8.85]                        | 121.64 | 0.86 | .977  |
| DDNOS vs PTSD      | 4.51 [-1.24, 10.25]                       | 76.84  | 2.37 | .224  |
| DDNOS vs MDD-ct    | 6.47 [0.91, 12.03]                        | 66.24  | 3.54 | .012  |
| DDNOS vs AD        | 8.04 [0.56, 15.52]                        | 104.57 | 3.23 | .027  |
| DDNOS vs MDD-noct  | 10.27 [4.62, 15.92]                       | 71.22  | 5.52 | <.001 |
| BPD vs PTSD        | 2.53 [-2.17, 7.22]                        | 101.96 | 1.62 | .671  |
| BPD vs MDD-ct      | 4.49 [0.03, 8.95]                         | 81.81  | 3.04 | .047  |
| BPD vs AD          | 6.06 [-0.69, 12.81]                       | 98.70  | 2.70 | .109  |
| BPD vs MDD-noct    | 8.29 [3.72, 12.86]                        | 91.25  | 5.46 | <.001 |
| PTSD vs MDD-ct     | 1.96 [-0.19, 4.12]                        | 628.73 | 2.69 | .102  |
| PTSD vs AD         | 3.53 [-2.09, 9.15]                        | 57.62  | 1.92 | .476  |
| PTSD vs MDD-noct   | 5.76 [3.37, 8.16]                         | 741.83 | 7.11 | <.001 |
| MDD-ct vs AD       | 1.57 [-3.86, 7.00]                        | 49.15  | 0.89 | .973  |
| MDD-ct vs MDD-noct | 3.80 [1.94, 5.66]                         | 877.61 | 6.05 | <.001 |
| AD vs MDD-noct     | 2.23 [-3.29, 7.75]                        | 53.12) | 1.24 | .876  |

*DID = dissociative identity disorder; DDNOS = dissociative disorder not otherwise specified; BPD = borderline personality disorder; PTSD = post-traumatic stress disorder; MDD-ct = major depressive disorder with a background of childhood trauma; AD = anxiety disorder; MDD-noct = major depressive disorder with no background of childhood trauma*
